# Supplementary material
Source: HighWire-hosted journal article supplement (https://jnm.snmjournals.org/highwire/filestream/94661/field_highwire_adjunct_files/0/142299_Supplemental_Data.pdf)
Supplement: 142299_Supplemental_Data.pdf [file 142299_Supplemental_Data.pdf]

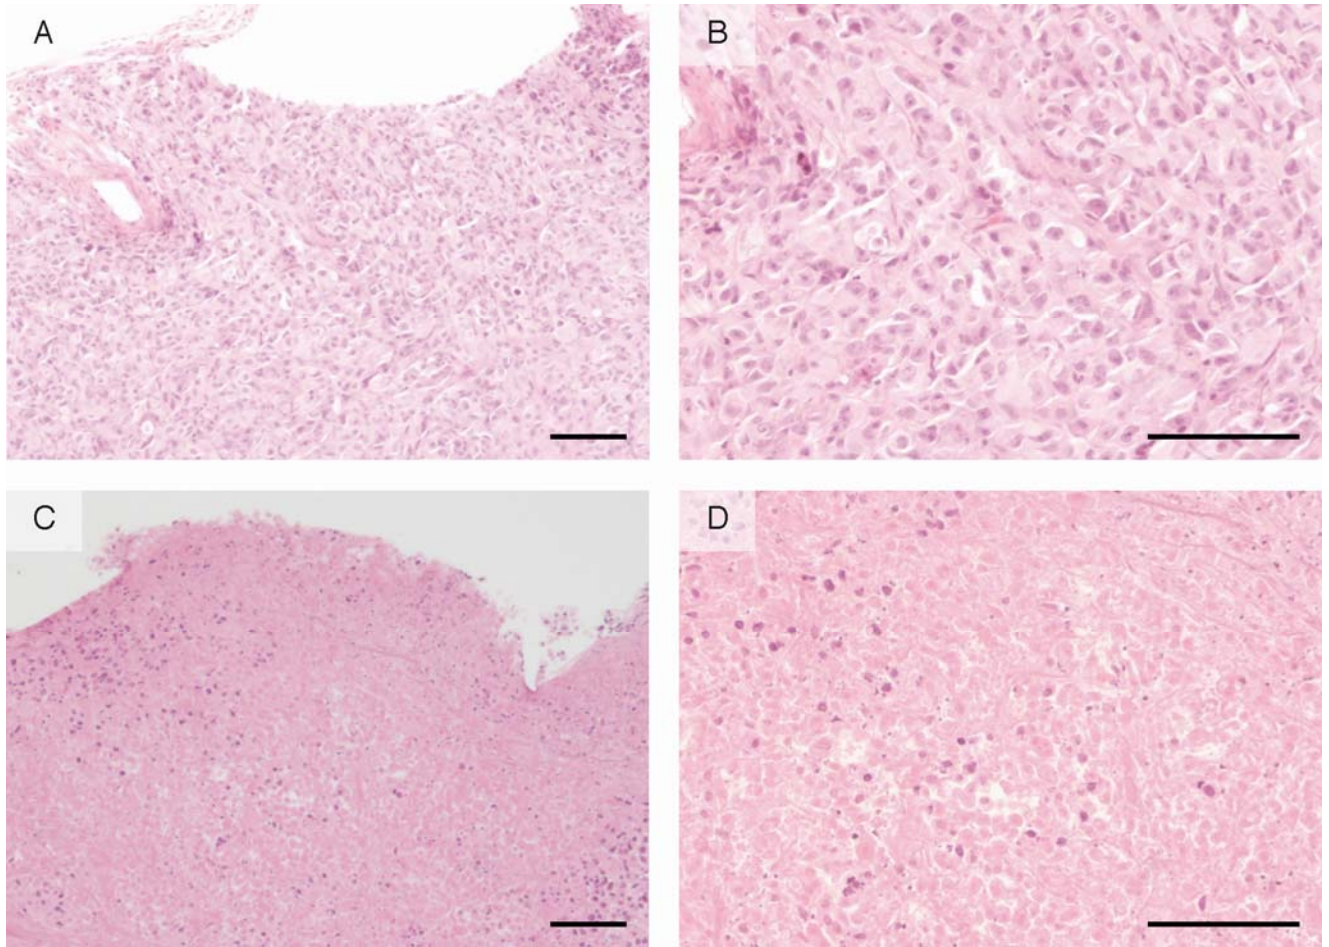

**Supplemental Figure 1. Histology.** Histopathological observation of H&E stained untreated (**A-B**) and treated (**C-D**) 2LMP-Luc tumors. Scale bar, 100  $\mu$ m.
